# Supplementary material for: Cocrystal formation of 4-methyl and 4-chlorobenzamide with carboxylic acids: Chloro/methyl interchange and crystal structure
Source: Royal Society of Chemistry journal article supplement (doi:10.1039/b607423e), 2006-01-01
Supplement: b607423e.pdf [file b607423e.pdf]

**Supplementary Information for Cocrystal formation of 4-methyl and 4-chlorobenzamide... Edwards, Jones & Motherwell**

**List of CSD reference codes for Cl-compounds Isostructural with Methyl-compound (Pair )**

BDIXNC  
LEJYUU  
PABZAT  
CINWAX  
CISFAL  
HAXTOP  
COFSUL10  
CTCYME  
CTPHOS  
JENHIV  
JIGGAH  
JORGIG  
KADMOR  
TEMZAM  
KIKCEM  
KOTGUV  
NOFXIP  
NQNCPH  
PABZEX  
ROHZIX  
TEHKUM  
YUFNUI  
ZUGPOH  
CORCUH  
CORCUH  
CPEFIM  
LEJYUU  
NCPAAA01  
PABZAT  
RIWRUK  
WIKKUU  
ZOHNUF

**) for Me-compounds Isostructural with Cl-compound (Pair )**

BDIXNA  
CORDES  
CORDES  
CINWEB  
CISFEP  
DEMPIU  
COFTAS10  
MTCYME  
MTPHOS  
VEVBUT  
FIXGAU

FAKKEH  
CUXDII  
TEMYUF  
SEDCIN  
KOTGOP  
NOFXOV  
MNIPZN  
LEKWON  
ROHZUJ  
TEHKOG  
JILXAD  
ZUGPOG  
LEJYUU  
PABZAT  
TOEFIM10  
KIDBUU  
QQQAZG03  
KIDBUU  
NOFWAG  
WEPZUM  
YOWVUF

**List of CSD reference codes for Cl-compounds NOT Isostructural with Methyl-  
compound (Nonpair )**

BADDAL10  
DPCARC  
AMCPHO  
DITYEK  
BAPMEK  
BEMGAB10  
BNCPHY  
CARBTC  
PCBZAM01  
NABRAJ  
CLBZAM10  
CLDOUR  
CHLCFM  
CHNAPQ  
CPXACA  
CITPAW10  
CLACAM  
CLACET01  
CLACTN  
CLANIC  
CLBZAP01  
CLCCIN  
CLTCIN  
CLEBQI  
CLMADA10  
CLMETH  
CLNBZA  
CLNOBE01  
CLPHOL02  
CLPOAC  
CLPURB  
CLSITR

CLSUC  
CLTXAN  
CLURID10  
HAXVAD  
CMPOSO  
COPHAZ  
CPEFIM  
CPHTCI10  
CPPTLM  
CSPBOP  
CTBOXT  
CTBOXT  
CUFWEF  
DAWZAC  
ZOHNIT  
PABZIB  
DUZTAT  
DUZTIB  
FABXAH10  
FEDPOT  
HALDOL  
HAXVIL  
HAXVOR  
HECKOP  
HEMZOO  
JENHIV  
JIBGEG  
JINHUJ  
JORYEU  
KAXXAI  
RASXIS  
KORSEP  
LELWAA  
LEZGUS  
ZUGNUK  
MCBENZ  
MCOXAP  
NCPAAA01  
NFCSEY  
NQNCPH01  
PABZEX  
PEKLIA  
PICBTZ10  
RIWMIT  
SAMPOL  
TBYXPC  
TEHKUM  
VAVZAT  
WEZFAI  
YOHDII  
YOHDII  
ZECPAY  
ZUWDEA  
ZZZVTY03

**List of CSD reference codes for Methyl-compounds NOT Isostructural with Cl-compound (Nonpair )**

CULPOO  
DPACTM  
GEBVAK  
GEXXOW  
EDMBOX  
BZCPTI11  
WEWBEF  
MECHLF10  
DABVAD01  
MEBENA  
NABQEM  
THYDIN  
CHOLAD04  
HMNAPQ10  
CMPHAA  
WARZOE  
ZZZKAY01  
PRONAC  
ACTOLD  
TOLDIN  
PTOLIC  
MECCIN  
MECCIN  
PBZQOX  
KUHZAO  
ETHANE01  
GOJROM  
ZZZMUC01  
CRESOL01  
BAKMUV  
MRFPUR  
MSILTR  
DLMSUC  
LEGSAR  
ARATHY10  
DEMPIU  
LEKPEW  
FIRLIB  
BTEFIM10  
MPTCHC  
ZEXRUP  
MSPBZP  
SAVDOI  
SAVDUO  
CUFWAB  
DAXBUZ  
YOWVUB  
KIDCAB  
LEJYOO  
LEJYOO  
HADLAZ  
FEDPUZ  
BILHAF  
DEMNIS  
DEMNIS  
WAMXOX  
YATWEV

Electronic Supplementary Material for CrystEngComm  
This journal is © The Royal Society of Chemistry 2006

VEVBUT01  
KIFZAA  
MACXPR10  
POPFOP  
XYANAC  
RASXAK  
SERZOE10  
DAMCOU  
LEZHAZ  
JIZKUY  
TOLUEN  
JELVEB  
QQQAZG02  
NFTSEY  
MNIPZN  
KIDCIJ  
YAFWUX  
PIMBTZ  
DUGWIL  
ZIXYOU  
NETSEK  
TEHKOG01  
HAXTUV  
RUVZUD  
BIRMIY  
MNDXTO  
ZECNOK  
DMETSO  
TRPETN

**CIF files are provided for the crystals I - IV**
